# Supplementary material for: Organic vapor sensing behaviors of conductive thermoplastic polyurethane–graphene nanocomposites
Source: Royal Society of Chemistry journal article supplement (doi:10.1039/c6tc00987e), 2016-01-01
Supplement: c6tc00987e1.pdf [file c6tc00987e1.pdf]

**Electronic Supplementary Information (ESI) for**

**Organic Vapor Sensing Behaviors of Conductive Thermoplastic  
Polyurethane-Graphene Nanocomposites**

Hu Liu,<sup>1,2</sup> Wenju Huang,<sup>1</sup> Xinru Yang,<sup>1</sup> Kun Dai,<sup>1,\*</sup> Guoqiang Zheng,<sup>1</sup>  
Chuntai Liu, Changyu Shen,<sup>1</sup> Xingru Yan,<sup>2</sup> Jiang Guo,<sup>2</sup> and Zhanhu Guo<sup>2,\*</sup>

<sup>1</sup> School of Materials Science and Engineering,  
The Key Laboratory of Material Processing and Mold of Ministry of Education, Zhengzhou  
University, Zhengzhou, Henan 450001, P.R. China

<sup>2</sup> Integrated Composites Laboratory (ICL),  
Department of Chemical & Biomolecular Engineering,  
University of Tennessee, Knoxville, TN 37996 USA

*\*: Correspondence authors*

E-mail addresses: [kundai@zzu.edu.cn](mailto:kundai@zzu.edu.cn) (K. D.),  
[zguo10@utk.edu](mailto:zguo10@utk.edu) (Z. G.)

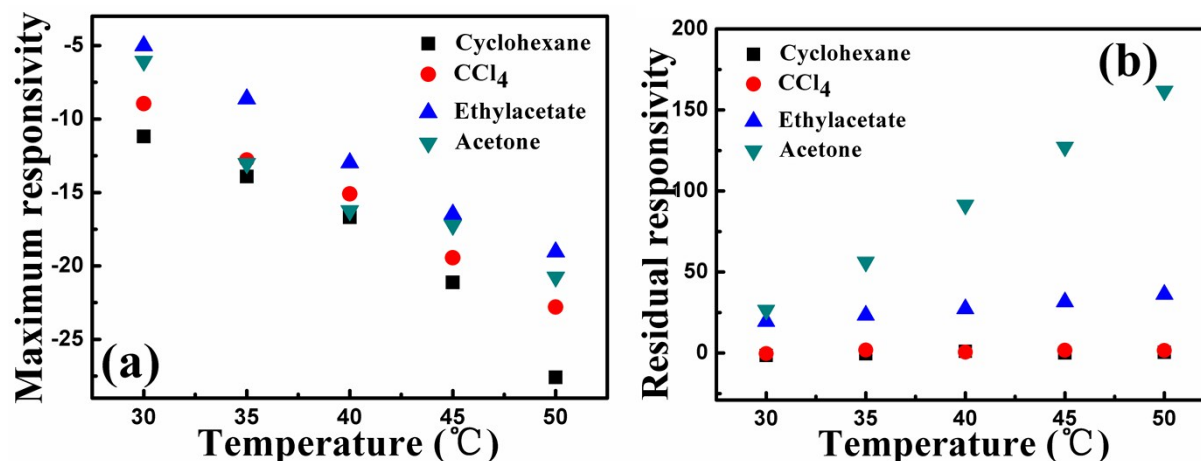

Fig. S1 The maximum responsivity and residual responsivity of CPCs towards different organic vapors at different temperatures.

Table S1. Comparison of organic vapor sensing behaviors of typical CPCs.

| <i>Sample</i>         | <i>Percolation threshold</i> | <i>Filler loading</i>     | <i>Sensing behavior</i> | <i>Ref.</i> |
|-----------------------|------------------------------|---------------------------|-------------------------|-------------|
| <i>CB/WPU</i>         | 0.95 wt%                     | 0.5 wt%                   | NVC                     | 1           |
| <i>CNT/TPU</i>        | 0.8 wt%                      | 2.3 wt%                   | PVC                     | 2           |
| <i>MWCNT/PLA</i>      | ≈2 wt%                       | 2 wt%, 3 wt%              | PVC                     | 3           |
| <i>CNT/PLA</i>        | 0.52 wt%                     | In the percolation region | PVC                     | 4           |
| <i>GO/PPr</i>         | —                            | —                         | PVC                     | 5           |
| <i>CB/PLA</i>         | 1.25 vol%                    | 1.39 vol%                 | PVC                     | 6           |
| <i>CNT/PMMA/UHWPE</i> | 0.09 vol%                    | 0.5 vol%                  | PVC                     | 7           |
| <i>Graphene/TPU</i>   | 0.1 wt%                      | 0.4 wt%                   | NVC                     | This work   |

The NVC phenomenon was also observed in CB/WPU composites when the CB content was below the percolation threshold. However, the imperfect conductive network in the composites with the conductive filler content below the percolation threshold induced unstable signal output. In the current study, the conductive graphene loading is above percolation threshold value and contributes to the stable signal observed in the main text.

## References

- 1 S. G. Chen, J. W. Hu, M. Q. Zhang and M. Z. Rong, *Sens. Actuators B: Chem.*, 2005, **105**, 187-193.
- 2 B. Kumar, M. Castro and J. F. Feller, *Sens. Actuators B: Chem.*, 2012, **161**, 621-628.
- 3 Q. Fan, Z. Qin, T. Villmow, J. Pionteck, P. Pótschke, Y. Wu, B. Voit and M. Zhu, *Sens. Actuators B: Chem.*, 2011, **156**, 63-70.
- 4 Y. Li, H. Liu, K. Dai, G. Zheng, C. Liu, J. Chen and C. Shen, *Sens. Actuators B: Chem.*, 2015, **221**, 1279-1289.
- 5 L. Zhang, C. Li, A. Liu and G. Shi, *J. Mater. Chem.*, 2012, **22**, 8438-8443.
- 6 K. Li, K. Dai, X. Xu, G. Zheng, C. Liu, J. Chen and C. Shen, *Colloid Polym. Sci.*, 2013, **291**, 2871-2878.
- 7 H. Pang, Y. Bao, L. Xu, D.-X. Yan, W.-Q. Zhang, J.-H. Wang and Z.-M. Li, *J. Mater. Chem.*, 2013, **1**, 4177-4181.
